1 **Expression of thioredoxin-1 in the ASJ neuron corresponds with and**  
2 **enhances intrinsic regenerative capacity under lesion conditioning in**  
3 ***C. elegans***

4 Noa W.F. Grooms, Michael Q. Fitzgerald, Leilani G. Schulting, Samuel E. Ureña,  
5 Samuel H. Chung

6  
7 **Abstract**

8 A conditioning lesion of the peripheral sensory axon triggers robust central axon  
9 regeneration in mammals. We visualize the ASJ neuron of *C. elegans* with a cell-  
10 specific green fluorescent protein reporter driven by a thioredoxin *trx-1* promoter and  
11 trigger conditioned regeneration by laser surgery or genetic disruption of sensory  
12 pathways. Utilizing calibrated fluorescent beads, we demonstrate that these neurons  
13 brighten when conditioned, suggesting that *trx-1* expression indicates regenerative  
14 capacity. We show that *trx-1* functionally enhances conditioned regeneration but inhibits  
15 non-conditioned regeneration. Finally, six strains isolated in a forward genetic screen for  
16 reduced fluorescence also show reduced axon outgrowth. We demonstrate a link  
17 between *trx-1* expression and the conditioned state that we leverage to rapidly assess  
18 regenerative capacity.

19  
20 **Keywords**

21 neuron regeneration; lesion conditioning; thioredoxin; genetic screen; *C. elegans*; fluorescence  
22 microscopy

23  
24 **Abbreviations**

25 CNS, central nervous system; EMS, ethyl methanesulfonate; DLK, dual-leucine kinase; TXN, thioredoxin;  
26 cAMP, cyclic adenosine monophosphate; CRE, cAMP responsive element; RAG, regeneration  
27 associated gene; RNAi, ribonucleic acid interference; a+d, axon + dendrite surgery

## 28 **Introduction**

29 The exquisitely complex and precise shape of neurons makes them highly susceptible  
30 to injury and disease. Compounding this weakness is the extremely limited regenerative  
31 capacity of the mammalian central nervous system (CNS), which severely limits  
32 functional recovery. Millions of people worldwide are affected by traumatic brain or  
33 spinal cord injury, amyotrophic lateral sclerosis (ALS), Alzheimer's, Parkinson's, or other  
34 neurodegenerative disorders (Feigin, *et al.*, 2021; James, *et al.*, 2019). The lack of  
35 effective treatments for these afflictions represents one of the areas of greatest need in  
36 modern medicine.

37 In a remarkable phenomenon known as lesion conditioning, damage to a neuron's  
38 peripheral sensory fiber triggers cellular mechanisms to drive regeneration in the CNS  
39 (McQuarrie and Grafstein, 1973; Richardson and Issa, 1984). Lesion conditioning  
40 fosters a pro-regenerative environment (Dubový, *et al.*, 2019; Xiong and Collins, 2012),  
41 enhances neuroregeneration (Hoffman, 2010) by overcoming CNS inhibitory growth  
42 cues (Chong, *et al.*, 1996; Oudega, *et al.*, 1994), and even dramatically reduces  
43 neurodegenerative markers in disease models (Franz, *et al.*, 2009). Therefore, lesion  
44 conditioning drives and enables regeneration that could treat CNS afflictions.

45 Our laboratory utilizes the roundworm *Caenorhabditis elegans* for their strongly  
46 conserved genetics with mammals, facile genetics, optical transparency, and rapid  
47 development. In a prior study, we established a lesion conditioning model in the ASJ  
48 sensory neuron (Chung, *et al.*, 2016). We discovered that mutation or pharmacological  
49 inhibition of genes in sensory transduction pathways can trigger conditioned  
50 regeneration, similar to the effect of a conditioning lesion. As shown in Tab. 1, these

51 interventions produce several observable phenotypes, including conditioned  
52 regeneration and a form of ectopic axon outgrowth that has the same underlying genetic  
53 pathway.

54

55 In this prior study, we cell-specifically labelled the ASJ using a transgenic green  
56 fluorescent protein (GFP) reporter driven by a promoter of *trx-1*, which is thioredoxin-1,  
57 an ortholog of human thioredoxin, TXN. We noticed by eye that interventions that  
58 condition the ASJ also brighten the neuron, indicating an upregulation of the gene  
59 driving our fluorescent label. Our visual observations are consistent with prior studies.  
60 Following peripheral nerve axotomy, TXN accumulates in the nucleus and dramatically  
61 increases throughout the cytoplasm (Mansur, *et al.*, 1998), indicating that it is a  
62 regeneration-associated gene (RAG) (Ma and Willis, 2015).

63 In this study, we quantify ASJ fluorescence and utilize it as an indicator of  
64 regenerative capacity. We quantitatively show that mutations that condition the ASJ by  
65 disrupting sensory signaling significantly brighten the neuron. Similarly, conditioning by  
66 lesion via laser surgery results in significantly increased fluorescence. The intensity of  
67 fluorescence following these interventions roughly corresponds with the neuron's  
68 regenerative capacity. Additionally, we show that the *trx-1* gene restrains non-  
69 conditioned regeneration and enhances conditioned regeneration. We leverage our  
70 fluorescent proxy to screen for mutations that underlie conditioning in the ASJ neuron.  
71 We isolate twelve mutant lines, spanning six putative mutations, with significantly  
72 reduced ASJ fluorescence. Six of these lines also display reduced ectopic outgrowth,  
73 indicating a disruption in the conditioning pathway. Our proxy enables efficient isolation

74 of genes underlying lesion conditioning by enabling a visually-based screen that does  
75 not require time-consuming surgery.

76

## 77 **Materials and methods**

78 *C. elegans* cultivation, strains, and mutagenesis: We followed established procedure for  
79 cultivation on agarose plates with OP50 bacteria at 20°C (Brenner, 1974). For  
80 fluorescent bead measurements, we cultivated animals on Bacto agarose plates at  
81 20°C for multiple generations. We cultivated animals on Difco agarose plates at 20°C  
82 and 25°C for laser surgeries and ectopic outgrowth experiments, respectively. We  
83 confirmed the genotypes for all mutant strains by polymerase chain reaction followed by  
84 Sanger sequencing through GENEWIZ (for single-nucleotide polymorphisms) or gel  
85 electrophoresis (for large deletions). Tab. 2 lists the genetics of the strains utilized. We  
86 followed established protocol for ethylmethanesulfonate (EMS) mutagenesis (Brenner,  
87 1974).

88

89 Laser surgery, imaging of axon regrowth and ectopic outgrowth, and postprocessing:  
90 We followed established procedures for animal immobilization by sodium azide (Chung,  
91 *et al.*, 2006) and femtosecond laser surgery (Harreguy, *et al.*, 2020; Wang, *et al.*, 2022).  
92 We severed only the axon (within 2 µm from the cell body), only the dendrite (2/3<sup>rd</sup> the  
93 length distal from the cell body), or both the axon and dendrite (axon+dendrite), and we  
94 reimaged 48 hours afterwards. We followed established procedures for immobilizing  
95 animals on agarose-azide pads, imaging axon growth, and postprocessing images to  
96 measure regenerated length (Chung, *et al.*, 2016).

97 Imaging with fluorescent beads: Fluorescence measurements are affected by  
98 numerous factors, including the intensity of the light source and transmission through  
99 microscope optics. These factors may change over time as the components age and  
100 their alignment degrades. To account for these effects, we calibrated fluorescence  
101 measurements by imaging animals alongside fluorescent beads and normalizing  
102 measurements across the images taken. We thoroughly vortexed 0.3% and 3% 2.5  $\mu\text{m}$   
103 stock bead solution (Invitrogen I7219) and mixed it with nematode growth medium  
104 (NGM) buffer (Chung, *et al.*, 2016) in a 5:1 NGM to bead volumetric ratio. We dropped  
105 5.0  $\mu\text{L}$  of the 5:1 solution to the center of the agarose-azide pad, and then picked adults  
106 to the bead solution droplet. To approximately match neuron to bead fluorescence, we  
107 used 3% beads for *tax-2* and *tax-4* strains and 0.3% beads for other strains and surgical  
108 conditions. We imaged worms through a Nikon 0.30 NA, 10x microscope objective and  
109 an Andor Zyla sCMOS Plus camera. Z-stack images were captured with 1- $\mu\text{m}$  spacing.

110 Postprocessing of fluorescence measurements: We create maximum intensity  
111 projections of our raw z-stack images in ImageJ and identify the brightest pixel within  
112 the ASJ cell body and dendrite for each animal. The pixel values are the raw fluorescent  
113 intensities. Additionally, we average the brightest pixel value within five representative  
114 beads in each raw image. We normalize and scale all raw neuron intensities to our  
115 reference (*tax-2*) intensities according to equation (1):

116 
$$(1) F_{normalized} = F_{raw} * \frac{\bar{F}_{ref\ bead}}{\bar{F}_{raw\ bead}} * \frac{F_{raw\ bead\ type}}{F_{ref\ bead\ type}}, \text{ where,}$$

117  $F_{raw}$  is raw fluorescent intensity of ASJ cell body or dendrite.

118  $\bar{F}_{raw\ bead}$  is the average of the fluorescence intensity of five representative beads  
119 in the raw image.

120  $\bar{F}_{ref\ bead}$  is average of the fluorescence intensity of all representative beads in the  
121 set of reference images.

122  $\frac{F_{raw\ bead\ type}}{F_{ref\ bead\ type}}$  is the true ratio of bead fluorescent intensities according to  
123 manufacturer data. This ratio is 0.08 if the raw image is calibrated with 0.3%  
124 beads or 1.00 if calibrated with 3% beads like the reference image.

125 The first ratio of Eq. (1) normalizes for day-to-day variability in imaging parameters  
126 between an image and the reference image set. If beads appear unusually bright in an  
127 image due to stronger illumination or increased transmission, then this ratio will  
128 compensate. If the beads are abnormally dim, the opposite will occur. The second ratio  
129 compares the expected brightness of the bead type used in the image against the  
130 reference bead type. Under ideal imaging conditions, this second ratio comparing the  
131 bead intensities from manufacturer data should be the inverse of the first ratio that  
132 compares the measured bead intensities. Therefore, the product of the two ratios  
133 should center around 1.0 if the bead intensities match their manufacturer specifications.

134 Statistics and interpretation of results: For axon length and fluorescence  
135 measurements, we calculated  $P$  values by the unpaired, unequal variance, two-tailed  $t$   
136 test. The conditioning effect is the difference between regenerated length after axon cut  
137 and after axon+dendrite cut. Its standard deviation is the square root of the sum of the  
138 squares of the regenerated length standard deviations. To compare conditioning effects

139 in different backgrounds, we calculated  $P$  values by the unpaired, unequal variance,  
140 two-tailed  $t$  test. To compare frequencies of ectopic outgrowth, we used Fisher's exact  
141 test.

142

## 143 **Results**

144 Defects in sensory transduction upregulate *trx-1* expression in the ASJ neuron.

145 The ASJ is an amphid sensory neuron located in the nose of *C. elegans* (Fig. 1a, left).

146 The amphids are bilateral, bipolar neurons following a stereotyped morphology

147 consisting of a cell body, a sensory dendrite that extends to the nose, and an axon that

148 mediates synaptic connections in the nerve ring (White, *et al.*, 1986). The ASJ axon

149 regenerates when it is severed. Mutation of dual-leucine kinase, *dlk-1*, completely

150 abolishes what we call "conventional" (*i.e.*, single-axotomy) axon regeneration (Chung,  
151 *et al.*, 2016). The regeneration of other *C. elegans* (Ghosh-Roy, *et al.*, 2010;

152 Hammarlund, *et al.*, 2009) and mammalian neurons (Itoh, *et al.*, 2009; Shin, *et al.*,

153 2012) also show a strong dependence on *dlk-1*. We trigger DLK-independent

154 regeneration by concomitantly severing the ASJ axon and dendrite. This DLK-

155 independent regeneration exhibits several hallmarks of lesion-conditioned regeneration.

156 We also uncovered several sensory mutations that significantly reduce ASJ neuronal

157 activity levels and thus condition the ASJ to regenerate in *dlk-1* mutants without a

158 physical lesion (Chung, *et al.*, 2016).

159

160 We characterized the effect of these mutations on the expression of *ptrx-1::trx-1::gfp*

161 translational fusion reporters *ofls1* and *ofls4*. The loci of crucial genes *egl-19* and *unc-*

43 are on chromosome IV close to the integration site of *ofls1*, which necessitated the

162 use of *ofls4*. While our previous study utilized an extrachromosomal array reporter,  
163 *ofls1* and *ofls4* are integrated into the genome, allowing more accurate comparison of  
164 expression levels across animals. We generated fluorescent animals with the mutations  
165 (Fig. 1a) and measured brightness of the ASJ cell bodies and dendrites to roughly  
166 assess TRX-1 levels and localization at a subcellular level (Fig. 1b). Scattered and out-  
167 of-focus light from the larger, brighter cell body often hides fine or dim structures  
168 nearby. Thus, we were unable to consistently measure the intensity of the axon. In wild-  
169 type (wt) animals, the ASJ cell body and dendrite are relatively dim. In a *dlk-1* mutant  
170 background, the ASJ fluorescence remains dim with a slight decrease in cell body  
171 fluorescence ( $p < 0.001$ ), consistent with a non-conditioned regenerative state. The  
172 remainder of the mutations significantly increase the brightness of the ASJ fibers and  
173 especially cell bodies ( $p < 0.001$  for all mutations). The most dramatic alteration in  
174 fluorescent intensity occurs under *tax-2* and *tax-4* (Fig. 1b,  $p < 0.001$ ), which also  
175 produce the strongest conditioned regeneration of the sensory mutations we studied.  
176 The fluorescence in the dendrites of each conditioned strain significantly increase  
177 except for *unc-36*, which may be consistent with the weaker conditioning effect of *unc-*  
178 *36* (Chung, *et al.*, 2016). Thus, the expression of *ptrx-1::trx-1::gfp* in the ASJ generally  
179 corresponds with regenerative potential but is not predictive at a single gene level.

180

181 Dendrite cuts upregulate *trx-1* expression and stimulate *dlk*-independent regeneration in  
182 the ASJ neuron.

183 We also examined changes in ASJ fluorescence in *dlk-1* mutant two days after cutting  
184 the axon, dendrite, or axon and dendrite concomitantly (denoted as “axon+dendrite” or



185 “a+d”). Figure 2a shows images of the ASJ in *dllk-1* animals 48 hours after surgery as  
186 well as in a chronically conditioned background, *tax-2*, to represent a strongly  
187 conditioned fluorescence level. Figure 2b shows the measured cell body and dendrite  
188 fluorescent intensities after each surgery. Figure 2c scatter plots the dendrite  
189 fluorescence against the cell body fluorescence, clustering neurons by fluorescent  
190 intensity for comparing to conditioned state. Our imaging procedure without surgery  
191 (mock condition) does not significantly alter fluorescence, and the data points are tightly  
192 clustered on the left side of the plot (dimmer ASJ fluorescence), representing a non-  
193 conditioned state. Surgical interventions significantly increase cell body and dendrite  
194 fluorescence. Changes in fluorescence after axon cut follow a roughly binary distribution  
195 where half remain as dim as the ASJ in mock animals and the other half noticeably  
196 brighten. Figure 2c clarifies that the cell body and the dendrite fluorescent intensities  
197 after axon cut are correlated, leading to a clear demarcation between non-conditioned  
198 and conditioned states. Severing the dendrite or axon+dendrite significantly increases  
199 ASJ fluorescence ( $p < 0.001$ ) of nearly the entire population to a brightness that begins  
200 to approach the level in *tax-2* animals (right side, Fig. 2b). Figure 2c confirms that  
201 neurons are strongly brightened following dendrite and axon+dendrite surgeries. The  
202 heightened levels of fluorescent intensity following dendrite or axon+dendrite cut are  
203 consistent with these interventions’ abilities to condition the neuron to regenerate. The  
204 fluorescence after axon+dendrite surgery is not significantly different from after dendrite  
205 surgery ( $p = 0.163$ ), suggesting that cutting the dendrite is sufficient for activating the  
206 conditioning response. These results are consistent with published findings that TXN

207 upregulates following peripheral axon injury, the hallmark of a RAG (Bai, *et al.*, 2003;  
208 Mansur, *et al.*, 1998).

209 Postsurgery regenerated length in ASJ expressing *offs1* match regeneration under a  
210 different translational reporter (Chung, *et al.*, 2016). Conventional regeneration in the  
211 ASJ is largely *dlk*-dependent. Figure 2d displays length regenerated by the ASJ in wild-  
212 type and *dlk-1* following axotomy or axon+dendrite cut. The ASJ regenerates 43  $\mu\text{m}$  on  
213 average following axotomy in wild-type but does not regenerate in *dlk-1* ( $p < 0.001$ ).  
214 Because *dlk-1* eliminates conventional ASJ regeneration, it exposes regeneration due  
215 to conditioning. Thus, we associate regeneration in *dlk-1* with conditioned regeneration.  
216 Note also that while axotomy alone does not produce conditioned regeneration in *dlk-1*,  
217 it significantly increases fluorescence of some neurons. This divergence indicates that  
218 the fluorescent reporter does not fully indicate the conditioned regenerative state and  
219 that *trx-1* expression alone is not sufficient for activating conditioned regeneration. We  
220 speculate that the significant increase in fluorescence after axotomy alone could be an  
221 upregulation of *trx-1* in response to neuroinjury without activating conditioning  
222 mechanisms. The conditioning effect is fundamentally the increase in regeneration  
223 arising from a dendrite cut, indicated by the arrows in the figure. Under our model,  
224 axon+dendrite cut triggers conventional and conditioned regeneration, which both  
225 contribute to the total length.

226

227 Opposite effects of *trx-1* on two forms of ASJ regeneration

228 Given that TXN is a RAG (upregulated following neuron injury), we wanted to  
229 determine if *trx-1* is involved in either form of regeneration. Our prior work utilized a

230 translational *ptrx-1::trx-1::gfp* fusion marker, potentially resulting in an overexpression of  
231 functional TRX-1 protein in the ASJ. Therefore, we visualized the ASJ with a  
232 transcriptional marker *ofls5[ptrx-1::gfp]* and probed the effects of *trx-1(ok1449)*, which is  
233 a loss-of-function allele deleting a 860 bp region spanning part of the proximal promoter  
234 region up to the last exon (Miranda-Vizueté, *et al.*, 2006). As shown in Fig. 3, the trends  
235 in regeneration in wild-type and *dlk-1* are consistent with regeneration under  
236 translational fusion reporters in Fig. 2 and in our prior study (Chung, *et al.*, 2016). In  
237 wild-type animals, the axon regenerates at a basal rate when it is severed, and mutation  
238 of *dlk-1* eliminates conventional regeneration. The addition of a dendrite cut increases  
239 regeneration in wild-type ( $p < 0.05$ ) and restores regeneration in *dlk-1* due to the  
240 conditioning effect ( $p < 0.001$ ).

241 ASJ conventional regeneration in *trx-1* is significantly stronger than in wild-type ( $p <$   
242  $0.001$ ). The increased regeneration in *trx-1* following axotomy indicate that *trx-1*  
243 restrains conventional regeneration in the ASJ. Introducing the *dlk-1* mutation to *trx-1*  
244 mutant background nearly eliminates conventional regeneration (Fig. 3), similar to  
245 results in translational fusions and *trx-1(+)*. The conditioning effect in *dlk-1; trx-1* is  
246 significantly less than the conditioning effect in *dlk-1*, as indicated by the arrows in Fig. 3  
247 ( $p < 0.05$ ). This indicates that *trx-1* enhances conditioned regeneration.

248

249 Screening of *trx-1* reporter isolates mutants with reduced regenerative potential.

250 One powerful technique for exposing genes underlying a phenotype is the unbiased  
251 forward screen (Brenner, 1974). In brief, a screen stochastically introduces mutations  
252 into the genomes of many animals. The correlation between *trx-1* expression and

253 regenerative capacity suggests that we can rapidly screen for genes involved in  
254 conditioned regeneration utilizing a *trx-1* fluorescent reporter. We exposed our  
255 chronically conditioned *tax-2* strain, labeled with *ofIs1*, to ethyl methanesulfonate  
256 (EMS). Starting in the F<sub>2</sub> generation, we isolated mutant lines by visually screening for  
257 decreased fluorescence in the ASJ neuron by eye (Fig. 4a) which potentially indicates a  
258 defect in a conditioning-related gene. Often, it was difficult to detect a significant  
259 reduction in cell body fluorescence, so we screened for significantly dimmer dendrites  
260 that we could not observe at a set magnification. We generated twelve mutant lines,  
261 spanning six putative mutations, with significantly reduced ASJ fluorescence in the cell  
262 body (Fig. 4b) or dendrite (Fig. 4c). Ten of these lines display significantly reduced  
263 fluorescence in both the dendrite and cell body ( $p < 0.001$ ).

264 Mutations to genes involved in the sensory pathways (*i.e.*, conditioning mutations)  
265 decrease ASJ neuronal activity and trigger regeneration. These sensory mutations,  
266 including the mutations in Fig. 1, also alter axon morphology in *C. elegans* sensory  
267 neurons and produce ectopic outgrowths (Coburn and Bargmann, 1996; Peckol, *et al.*,  
268 1999). We found that ectopic outgrowth extensively shares genetic and molecular  
269 mechanisms of axon growth with conditioned regeneration (Chung, *et al.*, 2016). Thus,  
270 ectopic outgrowth is an indicator of conditioned regenerative potential. As shown in Fig.  
271 4d, six of the strains we isolated exhibit significantly reduced frequencies of ectopic  
272 outgrowth compared to the original pre-mutagenized strain ( $p < 0.05$  or  $0.001$ ),  
273 suggesting that these strains possess a mutation that restrains conditioned regeneration  
274 in the ASJ. As we previously found, fluorescence is not always an accurate predictor of  
275 conditioned outgrowth. We identified some strains with significantly reduced cell body

276 and dendrite fluorescence but unchanged ectopic outgrowth frequency. We expect  
277 these strains to carry a mutation that decreases *trx-1* expression without impact to the  
278 conditioning pathway. In summary, our results demonstrate the utility and limitations of  
279 our fluorescence proxy as an indicator of ASJ intrinsic regenerative capacity.

280

## 281 **Discussion**

282 The change in expression of TXN following neuronal injury has been widely  
283 characterized in mammalian models. TXN induction occurs after a variety of insults,  
284 including ischemia (Tomimoto, *et al.*, 1993) and oxidative stress (Sugino, *et al.*, 1999).  
285 Importantly, motor and sensory nerve axotomy in rats leads to significantly increased  
286 levels of TXN (Mansur, *et al.*, 1998; Stemme, *et al.*, 1985). Likewise, we note that laser  
287 surgery of the ASJ neurites upregulates *trx-1* expression, as indicated by *trx-1::gfp*  
288 reporter. Our study offers three lines of evidence for associating this enhanced *trx-1*  
289 expression with the conditioned state. First, changes due to conditioning, including  
290 upregulation of RAGs, preferentially occurs after lesioning the sensory neurite rather  
291 than the central, or synaptic, neurite. In the ASJ neuron, severing the sensory dendrite  
292 strongly upregulates *trx-1* in nearly all neurons while severing the axon upregulates only  
293 50% of neurons to a lesser degree (Fig. 2b). Second, each tested mutation that  
294 conditions the ASJ neuron to improve regeneration (Chung, *et al.*, 2016) also  
295 upregulates expression of *trx-1* (Fig. 1b). Third, *trx-1* expression generally corresponds  
296 with conditioned regenerative potential (Fig. 1b). Out of the mutations tested, the *tax-2*  
297 and *tax-4* mutations brighten the ASJ the most and produce the highest levels of ectopic  
298 outgrowth and regeneration (Chung, *et al.*, 2016). However, this relationship is not

299 comprehensive. The *tax-2* and *tax-4* mutations produce marginally better conditioned  
300 regeneration compared to other mutations, and the *unc-36* mutation increases *trx-1*  
301 expression but minimally triggers regeneration (Chung, *et al.*, 2016). This differential  
302 alteration of *trx-1* expression and regeneration suggests a divergence of pathways  
303 underlying *trx-1* expression and conditioning.

304

305 To our knowledge, the role of *trx-1* in neuronal regeneration has not directly been  
306 studied, although prior evidence suggests its role as a mediator. Overexpressing TXN in  
307 mice can promote neuroprotective effects following stroke (Takagi, *et al.*, 1999), and  
308 TXN is required for nerve growth factor enhancement of nerve outgrowth in a tumor cell  
309 line (Bai, *et al.*, 2003). We directly test the role of *trx-1* in modulating conventional and  
310 conditioned regeneration in the ASJ (Fig. 3). We show that *trx-1* inhibits conventional  
311 regeneration, consistent with findings in the PLM sensory neuron in *C. elegans*. Animals  
312 defective in thioredoxin reductase *txr-1*, which enables *trx-1* activity (Stenvall, *et al.*,  
313 2011), display increased PLM regrowth (Kim, *et al.*, 2018). We also show that *trx-1*  
314 mediates *dlk*-independent conditioned regeneration, consistent with the upregulation of  
315 *trx-1* expression following conditioning interventions. The *trx-1* gene contains a  
316 regulatory region with cAMP responsive element (CRE) through which nerve growth  
317 factor acts to induce nerve outgrowth (Bai, *et al.*, 2003). The cAMP pathway is one of  
318 the best-described mechanisms for enhancing conditioned regeneration (Neumann, *et*  
319 *al.*, 2002; Qiu, *et al.*, 2002), and in *C. elegans*, cAMP signaling triggers conditioned  
320 regeneration (Chung, *et al.*, 2016). Thus, cAMP may contribute to conditioned  
321 regeneration in part via *trx-1* activation through its CRE region.

322

323 Using our fluorescence proxy, we isolated twelve mutant lines with significantly  
324 decreased ASJ fluorescence. Six of those lines display significantly reduced ectopic  
325 outgrowth, which is related to conditioned regeneration, indicating that they contain a  
326 mutation in the conditioning pathways. Additionally, we developed a fluorescent bead  
327 normalization protocol to facilitate quantitative comparison of fluorescence in genetic  
328 backgrounds or under different interventions. These tools enable us to pursue a rapid,  
329 yet quantitative approach to the question of neuronal regeneration. Our approach is  
330 complimentary to established techniques for identifying RAGs, such as microarray  
331 analysis (Costigan, *et al.*, 2002). In contrast to these RAGs, genes identified by our  
332 approach are highly likely to functionally underlie regeneration, by virtue of their  
333 involvement in ectopic outgrowth.

334 Our proxy demonstrates significant potential as we isolated several strains with  
335 reduced outgrowth potential by selecting for reduced ASJ fluorescence. However, we  
336 did identify equally as many dim strains without reduced outgrowth potential (Fig. 4d).  
337 These findings are not unexpected since we introduce stochastic mutations throughout  
338 the genome and screen with a fluorescent indicator that only roughly corresponds with  
339 regenerative capacity. False positives can be a common drawback to forward genetic  
340 screens under mutagenesis due to their stochastic nature. In these isolated lines, we  
341 expect that EMS disrupted pathways directly related to *trx-1* expression, genes that  
342 interact upstream of *trx-1*, or the transgenic label itself, thus causing a significant  
343 reduction in fluorescence. These effects can be mitigated by pursuing a reverse genetic  
344 screen under RNAi to test genes that have an expected role in conditioned

345 regeneration. A similar screen was successfully carried out on transcription factors  
346 regulating non-conditioned *trx-1* expression (Gonzalez-Barrios, *et al.*, 2015).

347 Additionally, we screen for decreased fluorescence by eye under the current  
348 workflow. This reduction in fluorescence is often difficult to distinguish by eye. Also, the  
349 range of fluorescence of the starting strain and mutant often overlap, which prevented  
350 outcrossing and identification of the causative mutations. We could improve the  
351 throughput and probability of success by implementing real-time quantitative  
352 measurements to more precisely screen for changes in fluorescence. For instance, we  
353 could utilize microfluidic devices to rapidly screen through animals for a reduction in  
354 fluorescence or implement whole plate imaging to quickly image entire populations of  
355 animals to select for decreased fluorescence.

356

## 357 **Outlook**

DRAFT

358 Studying regeneration *in vivo* remains difficult for experimental reasons and due to  
359 interacting pathways yet to be explored and fully defined. We have developed a single-  
360 cell model to study the conventional and conditioned regeneration pathways in the *C.*  
361 *elegans* ASJ neuron and a proxy to identify genes and potential therapeutic targets  
362 involved. Our study could be extended in multiple directions. First, the mechanisms  
363 through which *trx-1* (and potentially its redox activities) modulates regeneration remain  
364 unclear. This direction is of particular interest because *trx-1* specifically enhances  
365 conditioned, but inhibits conventional, regeneration. Second, the mechanisms that  
366 underlie *trx-1* expression and their relation to conditioning pathways should be clarified.  
367 Third, while *trx-1* expression is specific to the ASJ, our approach could be extended to



368 other neurons by labeling with fluorescent reporters driven by their RAGs. Neuron types  
369 and even subtypes have distinct regeneration capacities (Duan, *et al.*, 2015), but broad  
370 regeneration studies in multiple neurons are lacking. Examining regeneration in other  
371 neurons may illuminate new regeneration pathways. Our work thus represents an  
372 important first step in identifying undiscovered modulators of neuron regeneration and in  
373 establishing new approaches for rapidly studying regeneration.

374

375

### 376 **Acknowledgements**

377 We thank members of the Chung laboratory for taking part in the revision process. We  
378 acknowledge Peter Swoboda (Karolinska Institute, Huddinge, Sweden) for providing  
379 OE3417 and Antonio Miranda-Vizuete (Biomedicine Institute of Sevilla, Seville, Spain)  
380 for providing VZ763 and comments on the manuscript.

381

382

383

384 **References**

- 385 Bai, J., Nakamura, H., Kwon, Y.W., Hattori, I., Yamaguchi, Y., Kim, Y.C., Kondo, N.,  
386 Oka, S., Ueda, S., Masutani, H., *et al.* (2003). Critical roles of thioredoxin in nerve  
387 growth factor-mediated signal transduction and neurite outgrowth in PC12 cells. *J*  
388 *Neurosci* 23, 503-509.
- 389 Brenner, S. (1974). The genetics of *Caenorhabditis elegans*. *Genetics* 77, 71-94.
- 390 Chong, M.S., Woolf, C.J., Turmaine, M., Emson, P.C., and Anderson, P.N. (1996).  
391 Intrinsic versus extrinsic factors in determining the regeneration of the central processes  
392 of rat dorsal root ganglion neurons: The influence of a peripheral nerve graft. *J Comp*  
393 *Neurol* 370, 97-104.
- 394 Chung, S.H., Awal, M.R., Shay, J., McLoed, M.M., Mazur, E., and Gabel, C.V. (2016).  
395 Novel DLK-independent neuronal regeneration in *Caenorhabditis elegans* shares links  
396 with activity-dependent ectopic outgrowth. *Proc Natl Acad Sci USA* 113, E2852-E2860.
- 397 Chung, S.H., Clark, D.A., Gabel, C.V., Mazur, E., and Samuel, A.D. (2006). The role of  
398 the AFD neuron in *C. elegans* thermotaxis analyzed using femtosecond laser ablation.  
399 *BMC Neurosci* 7, 30.
- 400 Coburn, C.M., and Bargmann, C.I. (1996). A putative cyclic nucleotide-gated channel is  
401 required for sensory development and function in *C. elegans*. *Neuron* 17, 695-706.
- 402 Costigan, M., Befort, K., Karchewski, L., Griffin, R.S., D'Urso, D., Allchorne, A., Sitarski,  
403 J., Mannion, J.W., Pratt, R.E., and Woolf, C.J. (2002). Replicate high-density rat  
404 genome oligonucleotide microarrays reveal hundreds of regulated genes in the dorsal  
405 root ganglion after peripheral nerve injury. *BMC Neurosci* 3.
- 406 Duan, X., Qiao, M., Bei, F., Kim, I.-J., He, Z., and Sanes, Joshua R. (2015). Subtype-  
407 Specific Regeneration of Retinal Ganglion Cells following Axotomy: Effects of  
408 Osteopontin and mTOR Signaling. *Neuron* 85, 1244-1256.
- 409 Dubový, P., Klusáková, I., Hradilová-Sviženská, I., Brázda, V., Kohoutková, M., and  
410 Joukal, M. (2019). A Conditioning Sciatic Nerve Lesion Triggers a Pro-regenerative  
411 State in Primary Sensory Neurons Also of Dorsal Root Ganglia Non-associated With the  
412 Damaged Nerve. *Front Cell Neurosci* 13.
- 413 Feigin, V.L., Vos, T., Alahdab, F., Amit, A.M.L., Bärnighausen, T.W., Beghi, E.,  
414 Beheshti, M., Chavan, P.P., Criqui, M.H., Desai, R., *et al.* (2021). Burden of  
415 Neurological Disorders Across the US From 1990-2017. *JAMA Neurology* 78, 165.
- 416 Franz, C.K., Quach, E.T., Krudy, C.A., Federici, T., Kliem, M.A., Snyder, B.R., Raore,  
417 B., and Boulis, N.M. (2009). A Conditioning Lesion Provides Selective Protection in a  
418 Rat Model of Amyotrophic Lateral Sclerosis. *PLOS ONE* 4, 8.
- 419 Ghosh-Roy, A., Wu, Z.L., Goncharov, A., Jin, Y.S., and Chisholm, A.D. (2010). Calcium  
420 and Cyclic AMP Promote Axonal Regeneration in *Caenorhabditis elegans* and Require  
421 DLK-1 Kinase. *J Neurosci* 30, 3175-3183.
- 422 Gonzalez-Barrios, M., Fierro-Gonzalez, J.C., Krpelanova, E., Mora-Lorca, J.A.,  
423 Pedrajas, J.R., Penate, X., Chavez, S., Swoboda, P., Jansen, G., and Miranda-Vizuete,  
424 A. (2015). Cis- and Trans-Regulatory Mechanisms of Gene Expression in the ASJ  
425 Sensory Neuron of *Caenorhabditis elegans*. *Genetics* 200, 123-U269.
- 426 Hammarlund, M., Nix, P., Hauth, L., Jorgensen, E.M., and Bastiani, M. (2009). Axon  
427 Regeneration Requires a Conserved MAP Kinase Pathway. *Science* 323, 802-806.

428 Harreguy, M.B., Marfil, V., Grooms, N.W.F., Gabel, C.V., Chung, S.H., and Haspel, G.  
429 (2020). Ytterbium-doped fibre femtosecond laser offers robust operation with deep and  
430 precise microsurgery of *C. elegans* neurons. *Sci Rep* 10, 4545.  
431 Hoffman, P.N. (2010). A conditioning lesion induces changes in gene expression and  
432 axonal transport that enhance regeneration by increasing the intrinsic growth state of  
433 axons. *Exp Neurol* 223, 11-18.  
434 Itoh, A., Horiuchi, M., Bannerman, P., Pleasure, D., and Itoh, T. (2009). Impaired  
435 regenerative response of primary sensory neurons in ZPK/DLK gene-trap mice.  
436 *Biochemical and Biophysical Research Communications* 383, 258-262.  
437 James, S.L., Theadom, A., Ellenbogen, R.G., Bannick, M.S., Montjoy-Venning, W.,  
438 Lucchesi, L.R., Abbasi, N., Abdulkader, R., Abraha, H.N., Adsuar, J.C., *et al.* (2019).  
439 Global, regional, and national burden of traumatic brain injury and spinal cord injury,  
440 1990–2016: a systematic analysis for the Global Burden of Disease Study 2016. *The*  
441 *Lancet Neurology* 18, 56-87.  
442 Kim, K.W., Tang, N.H., Piggott, C.A., Andrusiak, M.G., Park, S., Zhu, M., Kurup, N.,  
443 Cherra, S.J., Wu, Z., Chisholm, A.D., *et al.* (2018). Expanded genetic screening in  
444 *Caenorhabditis elegans* identifies new regulators and an inhibitory role for NAD<sup>+</sup> in  
445 axon regeneration. *eLife* 7.  
446 Ma, T.C., and Willis, D.E. (2015). What makes a RAG regeneration associated? *Front*  
447 *Mol Neurosci* 8, 13.  
448 Mansur, K., Iwahashi, Y., Kiryu-Seo, S., Su, Q., Namikawa, K., Yodoi, J., and Kiyama,  
449 H. (1998). Up-regulation of thioredoxin expression in motor neurons after nerve injury.  
450 *Mol Brain Res* 62, 86-91.  
451 McQuarrie, I.G., and Grafstein, B. (1973). Axon Outgrowth Enhanced by a Previous  
452 Nerve Injury. *Arch Neurol* 29, 53-55.  
453 Miranda-Vizuete, A., Gonzalez, J.C., Gahmon, G., Burghoorn, J., Navas, P., and  
454 Swoboda, P. (2006). Lifespan decrease in a *Caenorhabditis elegans* mutant lacking  
455 TRX-1, a thioredoxin expressed in ASJ sensory neurons. *FEBS Lett* 580, 484-490.  
456 Neumann, S., Bradke, F., Tessier-Lavigne, M., and Basbaum, A.I. (2002). Regeneration  
457 of sensory axons within the injured spinal cord induced by intraganglionic cAMP  
458 elevation. *Neuron* 34, 885-893.  
459 Oudega, M., Varon, S., and Hagg, T. (1994). Regeneration of Adult Rat Sensory Axons  
460 into Intraspinous Nerve Grafts: Promoting Effects of Conditioning Lesion and Graft  
461 Predegeneration. *Exp Neurol* 129, 194-206.  
462 Peckol, E.L., Zallen, J.A., Yarrow, J.C., and Bargmann, C.I. (1999). Sensory activity  
463 affects sensory axon development in *C. elegans*. *Development* 126, 1891-1902.  
464 Qiu, J., Cai, C.M., Dai, H.N., McAtee, M., Hoffman, P.N., Bregman, B.S., and Filbin,  
465 M.T. (2002). Spinal axon regeneration induced by elevation of cyclic AMP. *Neuron* 34,  
466 895-903.  
467 Richardson, P.M., and Issa, V.M.K. (1984). Peripheral Injury Enhances Central  
468 Regeneration of Primary Sensory Neurons. *Nature* 309, 791-793.  
469 Shin, J.E., Cho, Y.C., Beirowski, B., Milbrandt, J., Cavalli, V., and DiAntonio, A. (2012).  
470 Dual Leucine Zipper Kinase Is Required for Retrograde Injury Signaling and Axonal  
471 Regeneration. *Neuron* 74, 1015-1022.  
472 Stemme, S., Hansson, H.A., Holmgren, A., and Rozell, B. (1985). Axoplasmic transport  
473 of thioredoxin and thioredoxin reductase in rat sciatic nerve. *Brain Res* 359, 140-146.

474 Stenvall, J., Fierro-González, J.C., Swoboda, P., Saamarthy, K., Cheng, Q., Cacho-  
475 Valadez, B., Arnér, E.S.J., Persson, O.P., Miranda-Vizueté, A., and Tuck, S. (2011).  
476 Selenoprotein TRXR-1 and GSR-1 are essential for removal of old cuticle during molting  
477 in *Caenorhabditis elegans*. *Proceedings of the National Academy of Sciences* 108,  
478 1064-1069.

479 Sugino, T., Nozaki, K., Takagi, Y., Hattori, I., Hashimoto, N., and Yodoi, J. (1999).  
480 Expression and distribution of redox regulatory protein, thioredoxin after metabolic  
481 impairment by 3-nitropropionic acid in rat brain. *Neurosci Lett* 275, 145-148.

482 Takagi, Y., Mitsui, A., Nishiyama, A., Nozaki, K., Sono, H., Gon, Y., Hashimoto, N., and  
483 Yodoi, J. (1999). Overexpression of thioredoxin in transgenic mice attenuates focal  
484 ischemic brain damage. *Proceedings of the National Academy of Sciences* 96, 4131-  
485 4136.

486 Tomimoto, H., Akiguchi, I., Wakita, H., Kimura, J., Hori, K., and Yodoi, J. (1993).  
487 Astroglial expression of ATL-derived factor, a human thioredoxin homologue, in the  
488 gerbil brain after transient global ischemia. *Brain Res* 625, 1-8.

489 Wang, Y.L., Grooms, N.W.F., and Chung, S.H. (2022). Transverse and axial resolution  
490 of femtosecond laser ablation. *J Biophotonics*, e202200042.

491 White, J.G., Southgate, E., Thomson, J.N., and Brenner, S. (1986). The structure of the  
492 nervous system of the nematode *Caenorhabditis elegans*. *Philos Transact B-Biol Sci*  
493 314, 1-340.

494 Xiong, X., and Collins, C.A. (2012). A conditioning lesion protects axons from  
495 degeneration via the Wallenda/DLK MAP kinase signaling cascade. *J Neurosci* 32, 610-  
496 615.

497

498

DRAFT

| interventions →                                   | condition neuron | → phenotype                                              |
|---------------------------------------------------|------------------|----------------------------------------------------------|
| surgery<br>conditioning mutations<br>pharmacology |                  | regeneration<br>ectopic outgrowth<br><b>fluorescence</b> |

499 **Table 1:** Interventions condition neurons by disrupting sensory signaling. Conditioning generates visible  
500 phenotypes. We examine *trx-1::gfp* fluorescence in this study.  
501

DRAFT

| mutation                              | translational marker             |                                  | transcriptional marker    |
|---------------------------------------|----------------------------------|----------------------------------|---------------------------|
|                                       | <i>ofls1[ptrx-1::trx-1::gfp]</i> | <i>ofls4[ptrx-1::trx-1::gfp]</i> | <i>ofls5[ptrx-1::gfp]</i> |
| none                                  | BOS2                             | OE3417                           | BOS41                     |
| <i>dlk-1(ju476)I</i>                  | BOS71                            |                                  | BOS44                     |
| <i>dlk-1(ju476)I; trx-1(ok1449)II</i> |                                  |                                  | BOS42                     |
| <i>egl-19(n582)IV</i>                 |                                  | BOS70                            |                           |
| <i>sax-1(ky211)X</i>                  | BOS74                            |                                  |                           |
| <i>tax-2(p691)I</i>                   | BOS72                            | BOS76                            |                           |
| <i>tax-4(p678)III</i>                 |                                  | BOS73                            |                           |
| <i>trx-1(ok1449)II</i>                |                                  |                                  | VZ763                     |
| <i>unc-36(e251)III</i>                | BOS69                            |                                  |                           |
| <i>unc-43(n1186n498)IV</i>            |                                  | BOS75                            |                           |

502 Table 2: Strains and genotypes utilized.

503

DRAFT

504 **Figure captions**

505 **Figure 1: Sensory mutations upregulate ASJ neuron expression of *trx-1*.** (a)

506 Leftmost panels: typical ASJ neuron and line drawing. Remainder of panels:  
507 representative images of *ptrx-1::trx-1::gfp* in wild-type (wt), mutant backgrounds.  
508 Sensory mutations, particularly *tax-2* and *tax-4*, upregulate expression. Identical  
509 brightness, contrast for all images except leftmost. Fluorescent bead indicated by #. (b)  
510 Quantification of fluorescence in part A. Data represented as average  $\pm$  standard  
511 deviation (SD).  $n = 50$  for each data point. \*\*  $p < 0.001$

512

513 **Figure 2: Dendrite cuts upregulate *trx-1* expression and condition ASJ to**

514 **regenerate.** (a) GFP fluorescence images of ASJ neuron. Fluorescent bead indicated  
515 by #. Identical brightness, contrast for all images. (b) Quantification of fluorescence in  
516 part A. Data represented as average  $\pm$  SD. Each dot represents one animal. (c) ASJ  
517 cell body and dendrite fluorescence distributions from part B. Dendrite cut brightens  
518 fluorescence in entire population. (d) Total length of ASJ regeneration following axon or  
519 axon+dendrite (a+d) cut in wt, *dlk-1*. Dendrite cut enhances ASJ regeneration under  
520 DLK-independent mechanism. Arrows represent conditioning effect, or contribution of  
521 conditioning to additional regenerated length from dendrite cut. Data represented as  
522 average  $\pm$  standard error of the mean (SEM).  $n \geq 20$  for all conditions. \*\*  $p < 0.001$ .

523 Control and *tax-2* images and data replicated from Fig. 1.

524

525 **Figure 3: TRX-1 modulates ASJ regeneration.** Total length of ASJ regeneration

526 depends on genetic background and surgery type. Mutation of TRX-1 enhances

527 regeneration after axotomy. Conditioning effect in *dlk-1*; *trx-1* animals significantly  
528 reduced compared to *dlk-1* animals. Arrows represent conditioning effect. Data  
529 represented as average  $\pm$  SEM.  $n \geq 20$  for all conditions. \*  $p < 0.05$ , \*\*  $p < 0.001$ .

530

531 **Figure 4: Fluorescence proxy enables isolation of mutants with reduced**  
532 **conditioned regenerative potential.** (a) ASJ images in control and post-mutagenesis  
533 animals. Fluorescent bead indicated by #. Identical brightness, contrast for all images.  
534 (b) Quantification of cell body fluorescence in part A. Reduced fluorescence in 11  
535 mutant lines. (c) Quantification of dendrite fluorescence in part A. Reduced fluorescence  
536 in 11 mutant lines. (d) Ectopic outgrowth frequency for control and post-mutagenesis  
537 strains. Reduced ectopic outgrowth in 6 lines. Fluorescence measurements:  $n = 50$ .  
538 Ectopic outgrowth:  $60 \leq n \leq 94$  for strains 3b, 6a, 6c;  $n \geq 150$  for other strains. Strain 4a  
539 not viable at cultivation temperature. Data represented as average  $\pm$  SD. \*  $p < 0.05$ , \*\*  
540  $p < 0.001$ . Control (*tax-2*) images and fluorescence data from Fig. 1.



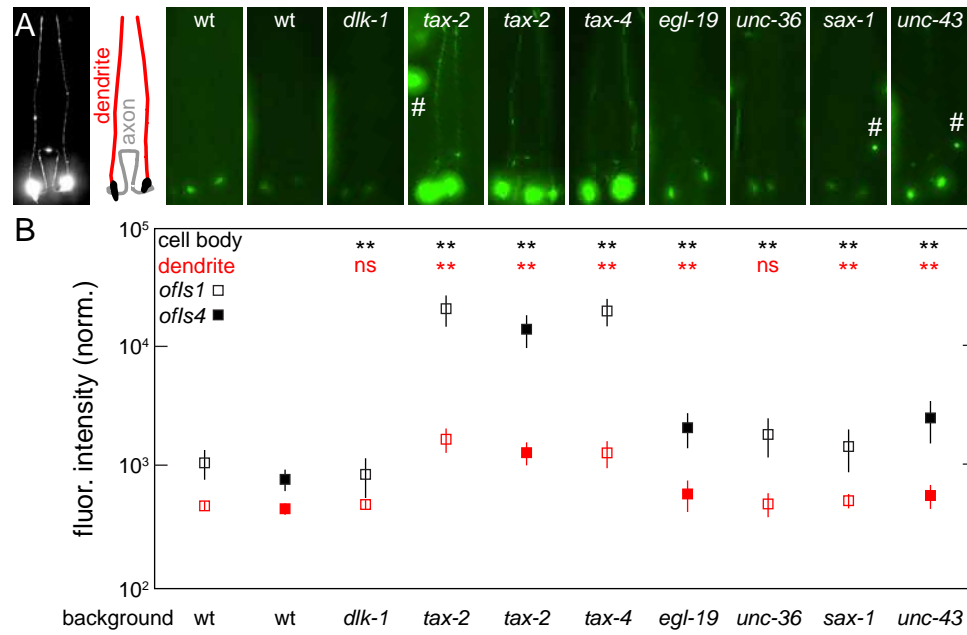

Figure 1  
Grooms, et al

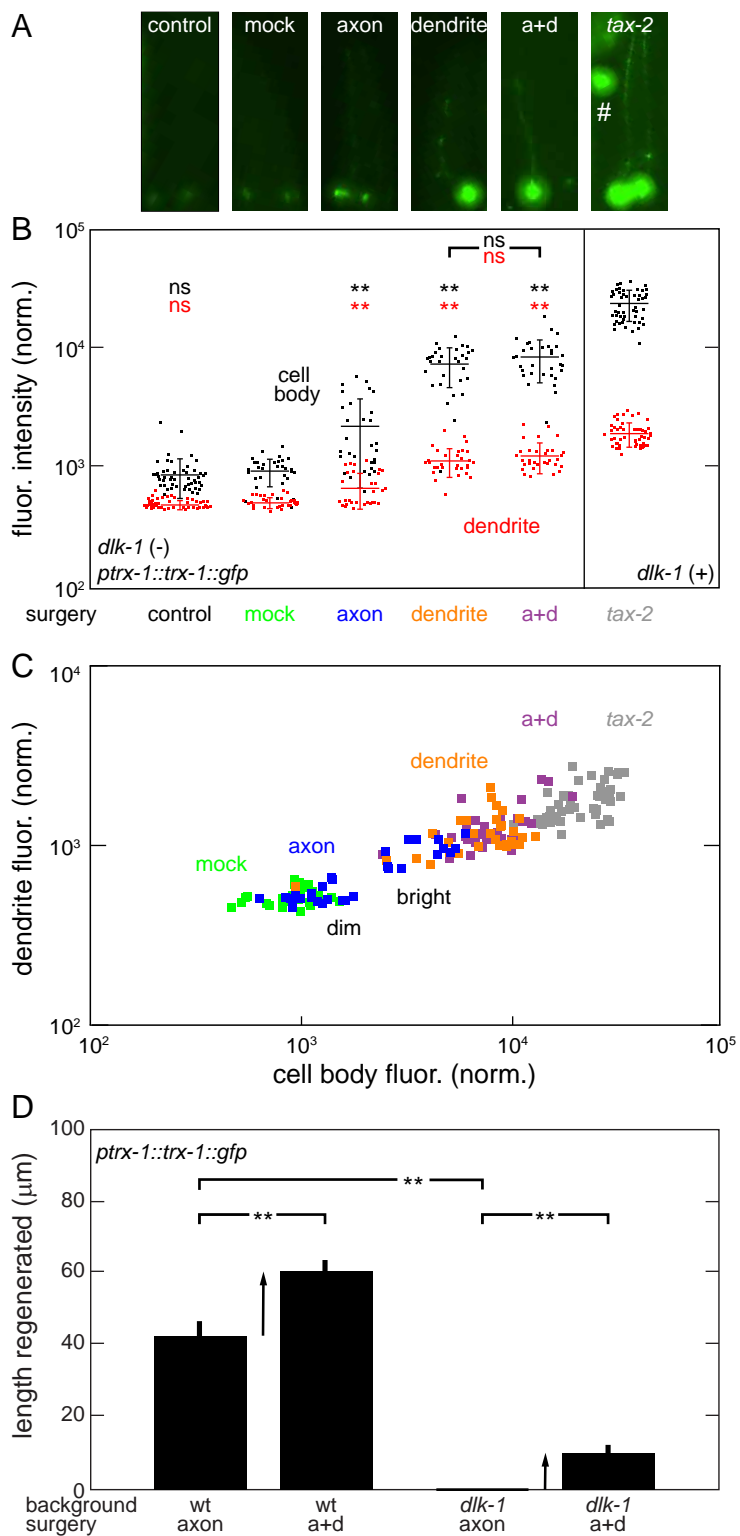

Figure 2  
Grooms, et al

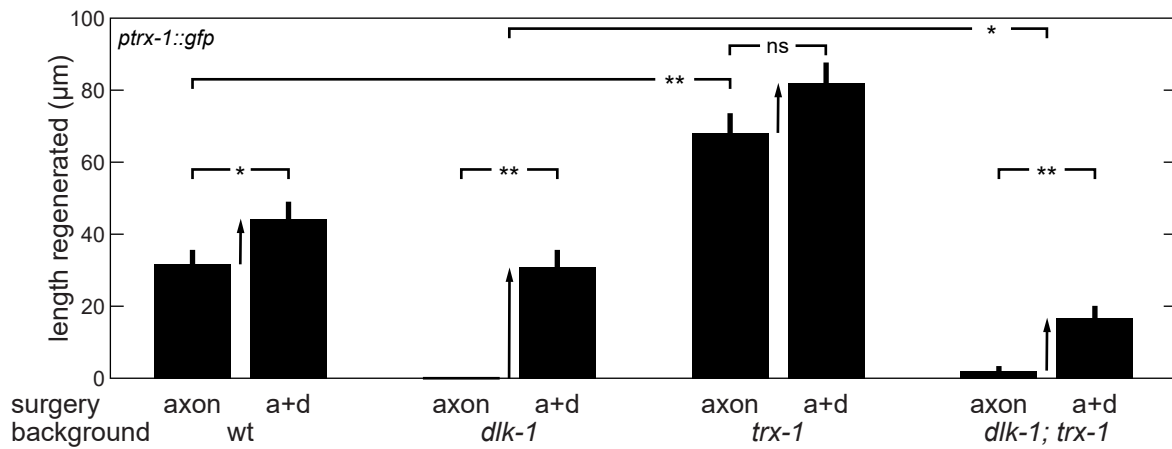

Figure 3  
Grooms, et al

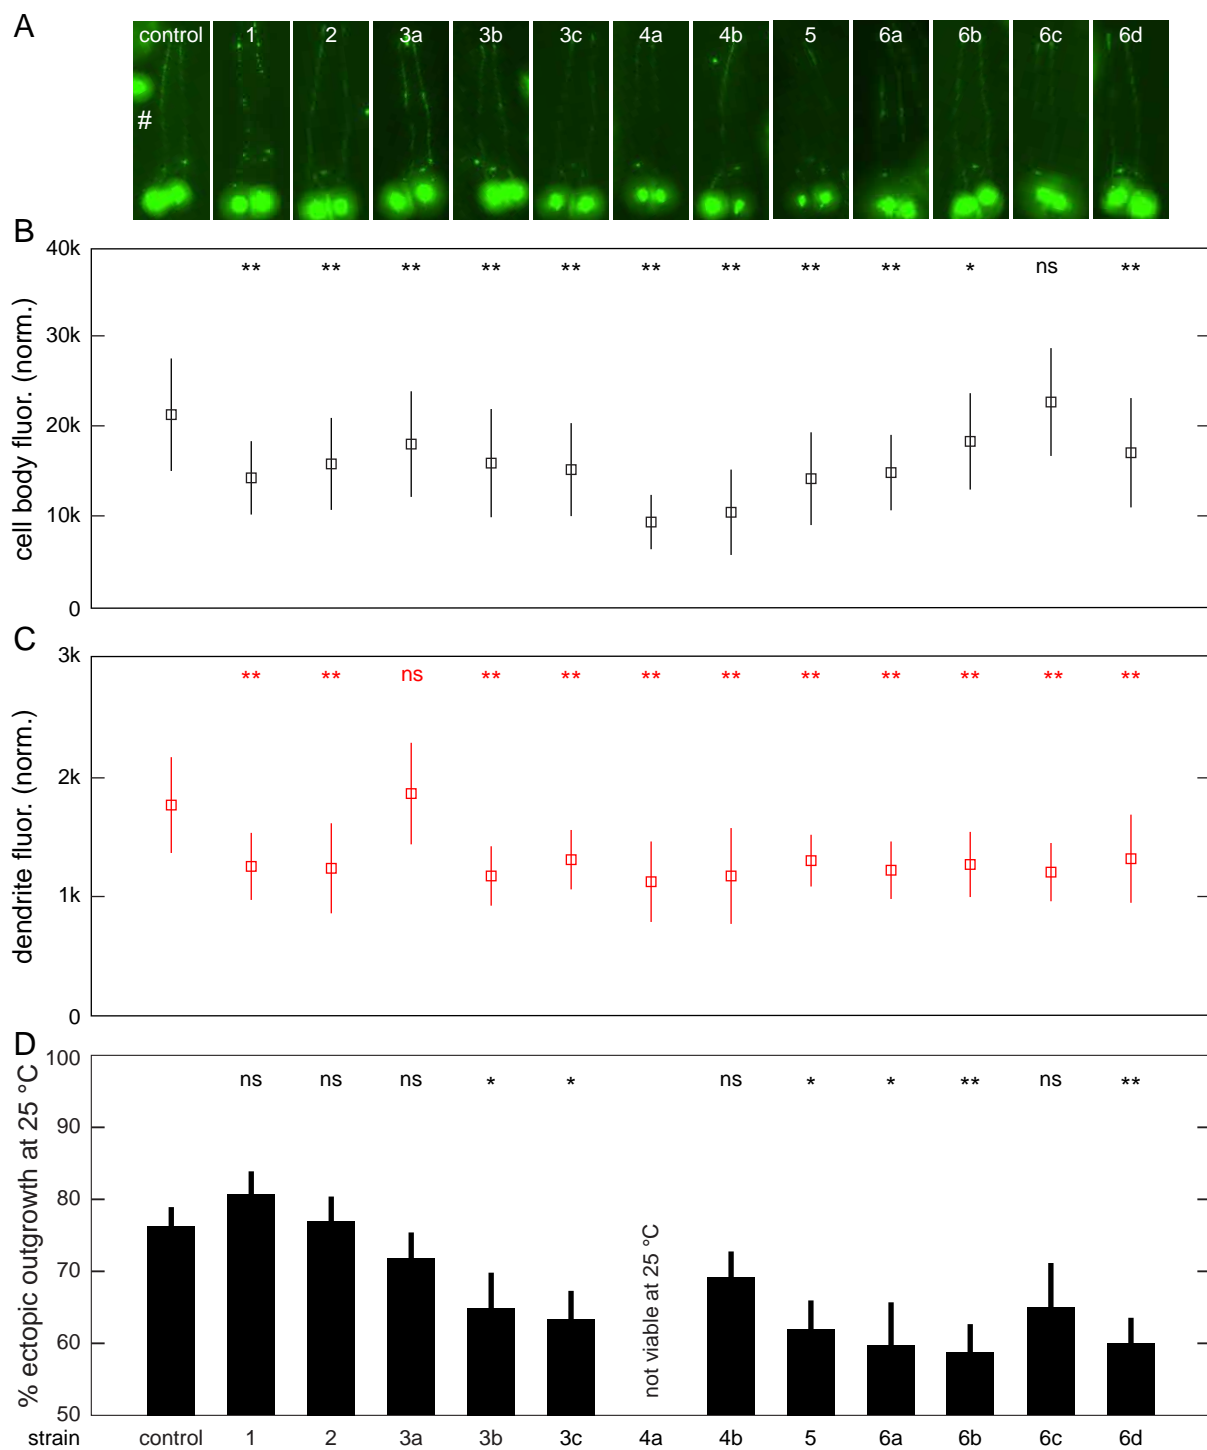

Figure 4  
Grooms, et al
